# Supplementary material for: A LAMP-based hydrogen ion selective electrochemical sensor for highly sensitive detection of Mycoplasma pneumoniae
Source: Royal Society of Chemistry journal article supplement (doi:10.1039/d4ay00341a), 2024-01-01
Supplement: d4ay00341a4.pdf [file d4ay00341a4.pdf]

Primers (Table S1) specific to gene of *M. pneumoniae* were designed and evaluated using the NUPACK web tool (<http://www.nupack.org/>) and NCBI primer-BLAST (<https://www.ncbi.nlm.nih.gov/tools/primer-blast>). The primers were synthesized by Sangon Biotech (Shanghai, China) .

**Table S1. Sequences of nucleic acids used in this work**

| Name                                           |     | Sequence (5'-3')                                      |
|------------------------------------------------|-----|-------------------------------------------------------|
| q-PCR primer set<br>( <sup>a</sup> CP017343.1) | F   | CGTAAACGATAGATACTAGCTGTC                              |
|                                                | R   | CCATAACTTTGCCAAGGATGTCA                               |
| LAMP primer set<br>( <sup>a</sup> CP017341.1)  | F3  | TGTTAGCGCGGTTAATGC                                    |
|                                                | B3  | TTCCAAATCACTAGGTGGATT                                 |
|                                                | FIP | GAGGAGACCCGAAACTGAGTTAGTGAACCAAAGTGAAAAATG<br>AC      |
|                                                | BIP | ACTGTTAGGTCAAACCTGAAAATGGCAAAGGACATACATACAAAT<br>CGTG |
|                                                | LF  | TTGCACTGTCTTGCGGT                                     |
|                                                | LB  | GTTCTGAAATACCAAGAGT                                   |

<sup>a</sup> GenBank accession number.
