# Supplementary figures and images for: A LAMP-based hydrogen ion selective electrochemical sensor for highly sensitive detection of Mycoplasma pneumoniae
Source: Royal Society of Chemistry journal article supplement (doi:10.1039/d4ay00341a), 2024-01-01

(a)

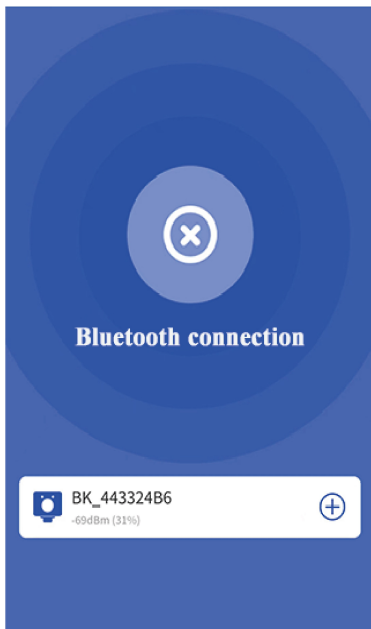

(b)

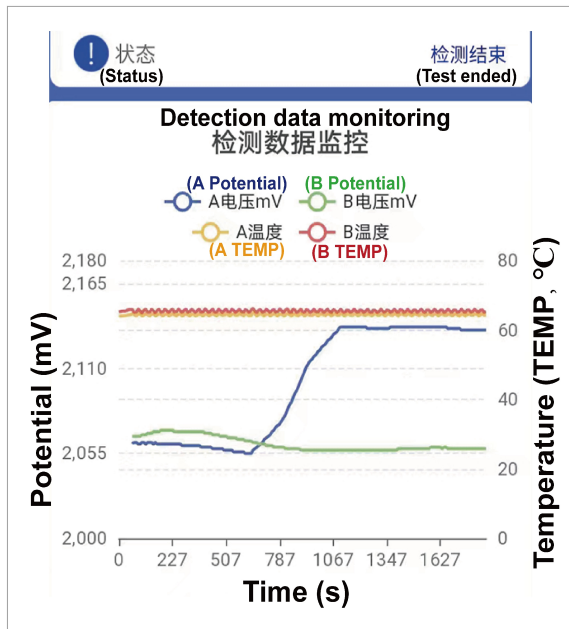

Supplement: d4ay00341a3.pdf [file d4ay00341a3.pdf]
